# Supplementary material
Source: Copernicus journal article supplement (doi:10.5194/egusphere-2026-2343)
Supplement: Supplementary file 1 [file egusphere-2026-2343-supplement.pdf]

**Supplementary figures for the main paper:**

**Assessing the potential of Individual Foraminifera Analyses ( $\delta^{18}\text{O}$ ) to reconstruct variability, seasonality and extremes in the tropical Indian Ocean**

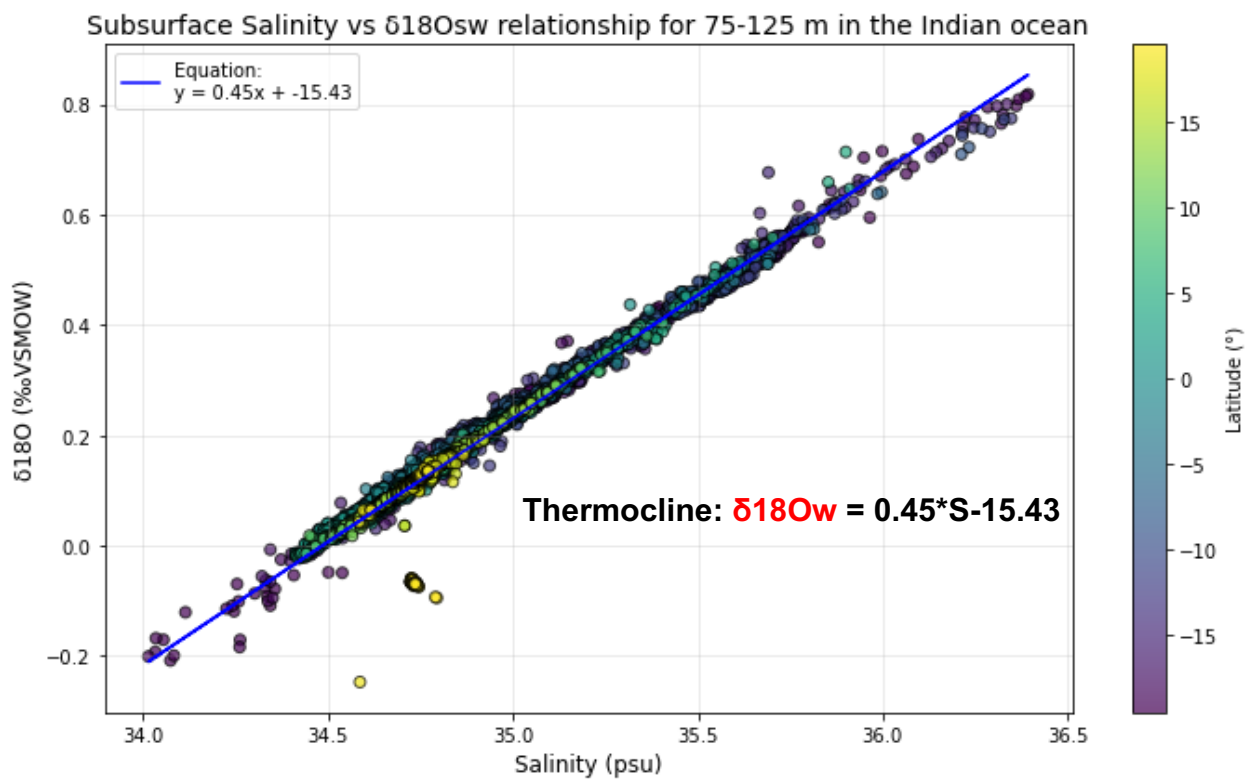

**Figure S1:** Relationship for  $\delta^{18}\text{O}_{\text{sw}}$  vs salinity for the subsurface in the tropical Indian Ocean

## Surface data

| Site       | Type          | n_tot | n_outliers | mean_all | std_all | mean_no_outliers | std_no_outliers | min      | max    | skewness | kurtosis | Shapiro_p | Dagostino_p | Normality  |
|------------|---------------|-------|------------|----------|---------|------------------|-----------------|----------|--------|----------|----------|-----------|-------------|------------|
| NIOP905    | Real_coretop  | 75    | 3          | -1,470   | 0,646   | -1,537           | 0,565           | -2,78    | 0,46   | 0,702    | 0,373    | 0,008     | 0,028       | Non-normal |
| NIOP905    | Synth_coretop | 60    | 0          | -1,613   | 0,377   | -1,613           | 0,377           | -2,302   | -0,847 | -0,035   | -0,981   | 0,148     | 0,041       | Non-normal |
| MD96-2060  | Real_coretop  | 41    | 2          | -1,676   | 0,465   | -1,750           | 0,336           | -2,442   | -0,065 | 1,450    | 2,719    | 0,001     | 0,000       | Non-normal |
| MD96-2060  | Synth_coretop | 60    | 0          | -2,114   | 0,353   | -2,114           | 0,353           | -2,799   | -1,515 | 0,043    | -1,259   | 0,007     | 0,000       | Non-normal |
| U1467      | Real_coretop  | 84    | 1          | -2,755   | 0,283   | -2,746           | 0,272           | -3,51    | -2,08  | -0,178   | -0,174   | 0,982     | 0,777       | Normal     |
| U1467      | Synth_coretop | 60    | 0          | -2,881   | 0,276   | -2,881           | 0,276           | -3,56905 | -2,381 | -0,481   | -0,636   | 0,050     | 0,147       | Normal     |
| SO189-39KL | Real_coretop  | 58    | 0          | -2,939   | 0,213   | -2,939           | 0,213           | -3,45774 | -2,498 | -0,234   | -0,024   | 0,516     | 0,684       | Normal     |
| SO189-39KL | Synth_coretop | 60    | 1          | -3,139   | 0,187   | -3,146           | 0,177           | -3,507   | -2,69  | 0,110    | -0,368   | 0,729     | 0,868       | Normal     |

## Thermocline

| Site      | Type          | n_tot | n_outliers | mean_all | std_all | mean_no_outliers | std_no_outliers | min    | max    | skewness | kurtosis | Shapiro_p | Dagostino_p | Normality  |
|-----------|---------------|-------|------------|----------|---------|------------------|-----------------|--------|--------|----------|----------|-----------|-------------|------------|
| NIOP905   | Real_coretop  | 37    | 0          | -0,027   | 0,526   | -0,027           | 0,526           | -0,93  | 1,19   | 0,674    | -0,011   | 0,084     | 0,176       | Normal     |
| NIOP905   | Synth_coretop | 60    | 0          | -0,641   | 0,431   | -0,641           | 0,431           | -1,362 | 0,398  | 0,486    | -0,536   | 0,073     | 0,192       | Normal     |
| MD96-2060 | Real_coretop  | 54    | 2          | -1,339   | 0,373   | -1,344           | 0,296           | -2,395 | 0,003  | 0,552    | 2,487    | 0,032     | 0,005       | Non-normal |
| MD96-2060 | Synth_coretop | 60    | 0          | -1,530   | 0,338   | -1,530           | 0,338           | -2,243 | -0,871 | 0,176    | -0,762   | 0,265     | 0,248       | Normal     |
| U1467     | Real_coretop  | 44    | 1          | -1,630   | 0,462   | -1,683           | 0,304           | -2,354 | 0,644  | 2,790    | 11,592   | 0,000     | 0,000       | Non-normal |
| U1467     | Synth_coretop | 60    | 0          | -1,854   | 0,315   | -1,854           | 0,315           | -2,361 | -0,992 | 0,406    | -0,442   | 0,184     | 0,334       | Normal     |

Figure S2: Synthesis of all statical parameter of each dataset used in this study

## Surface data

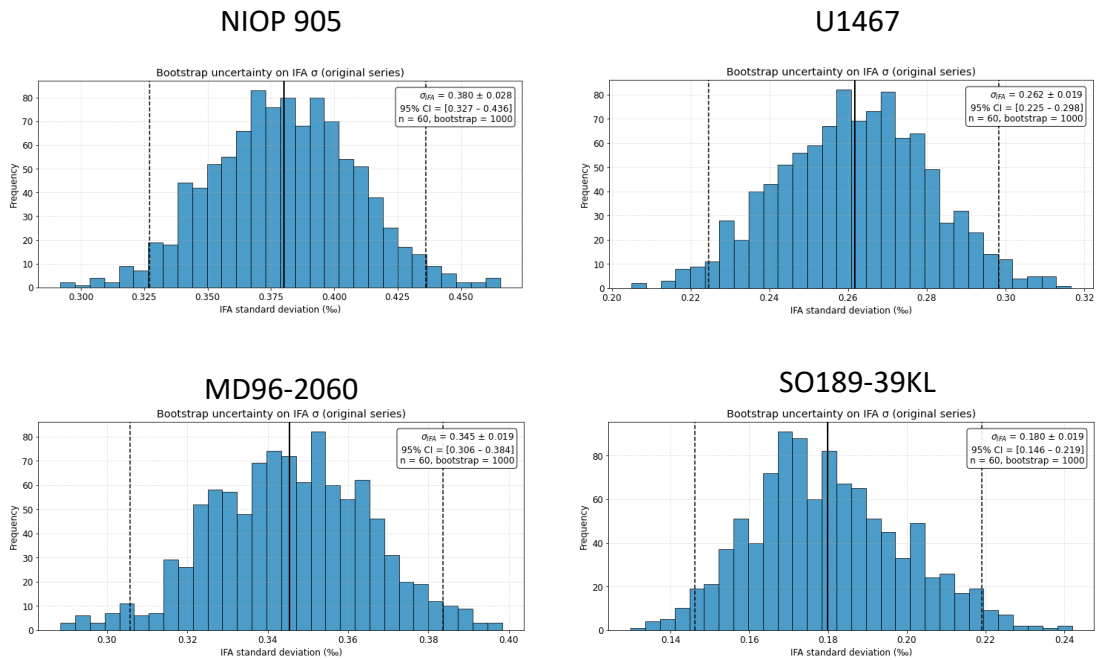

# Thermocline

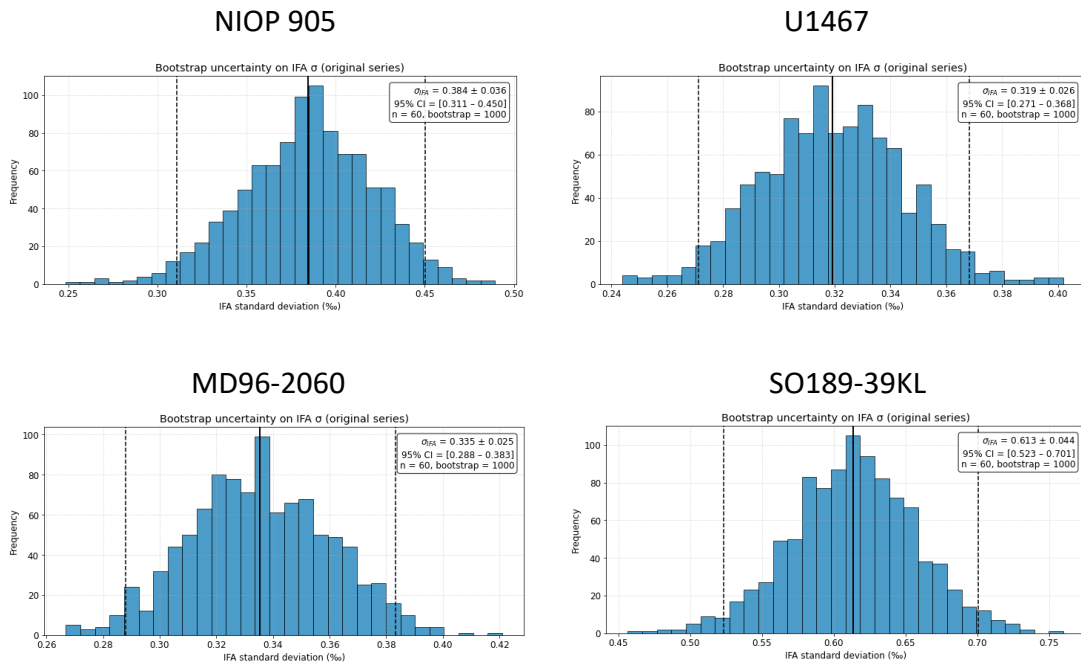

**Figure S3:** Monte Carlo bootstrap resampling of N=60 individuals to estimate the sampling distribution (1000 times) of the standard deviation for the Surface and thermocline depth

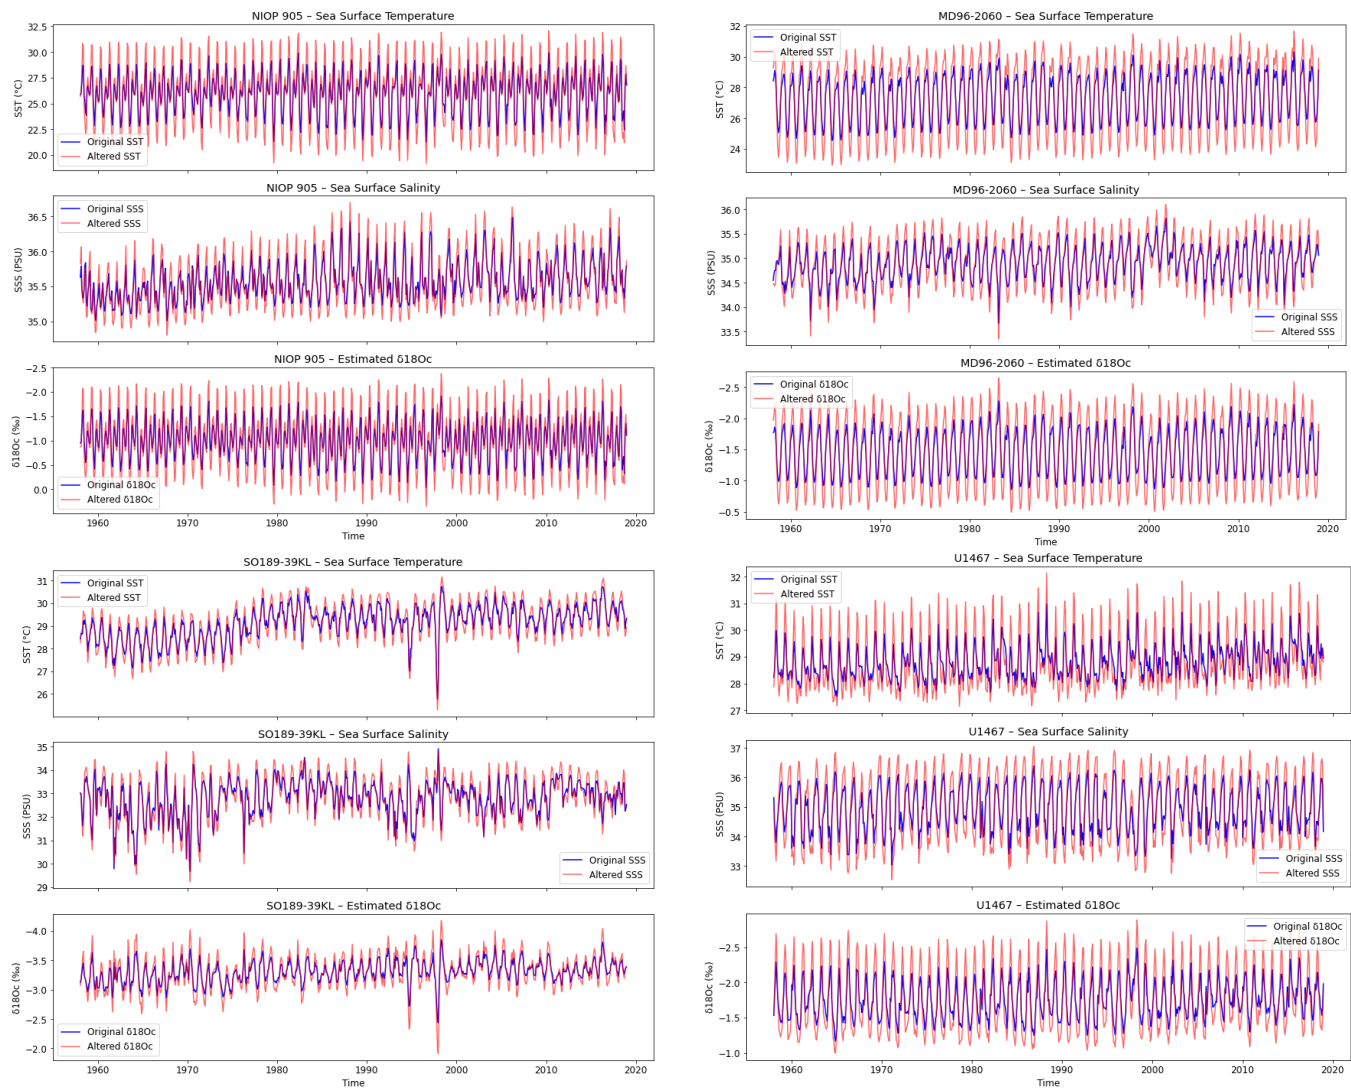

**Figure S4:** Comparison of monthly reanalysis dataset for an “original” and “Altered” climate for the surface and thermocline temperature, Salinity,  $\delta^{18}O$

# Surface

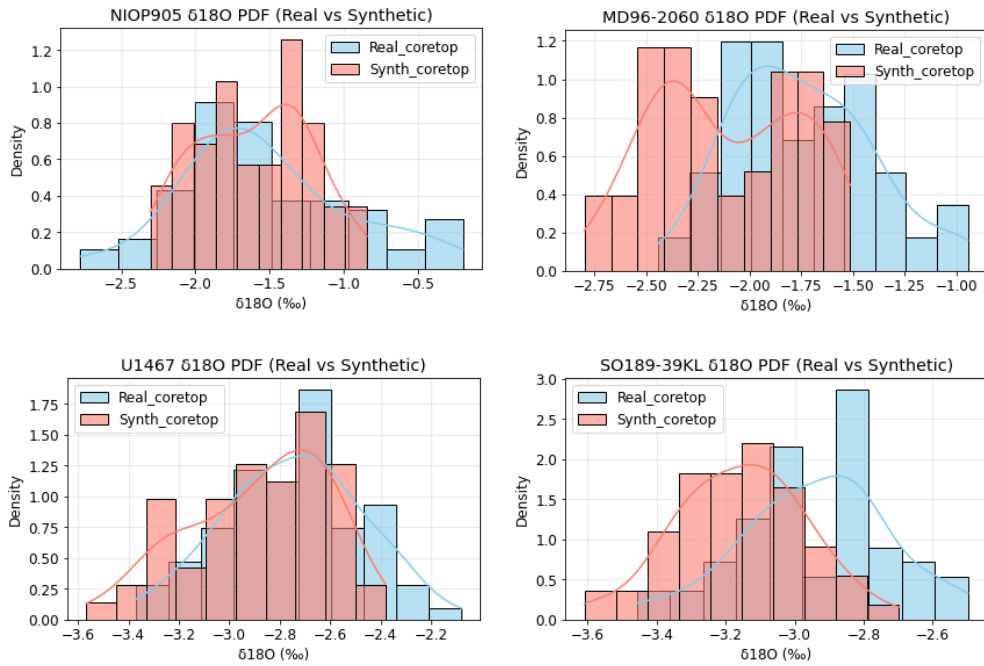

# Thermocline

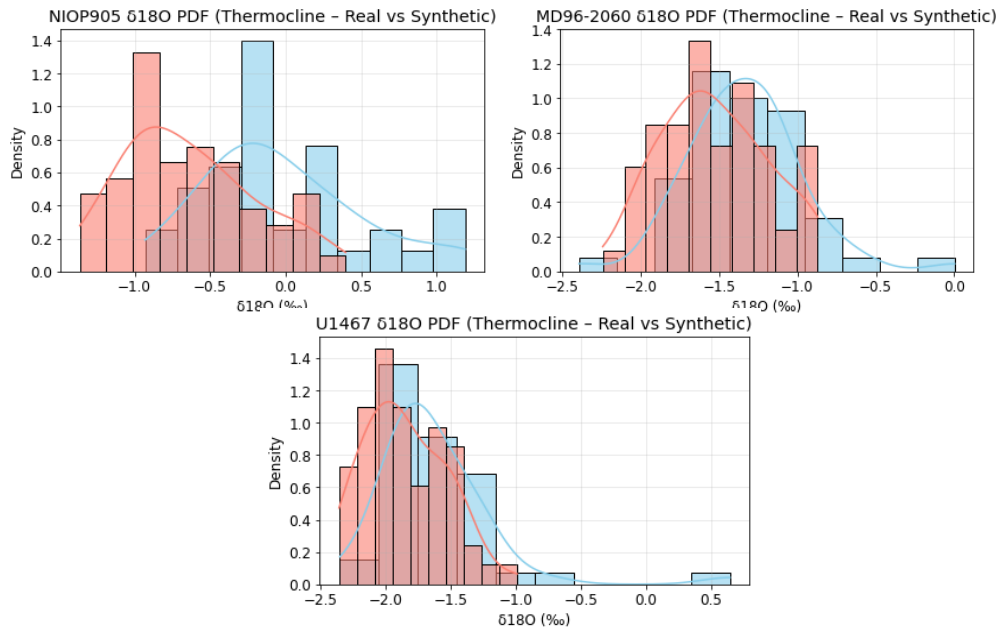

Figure S5: PDF function from histogram for each site at surface and thermocline

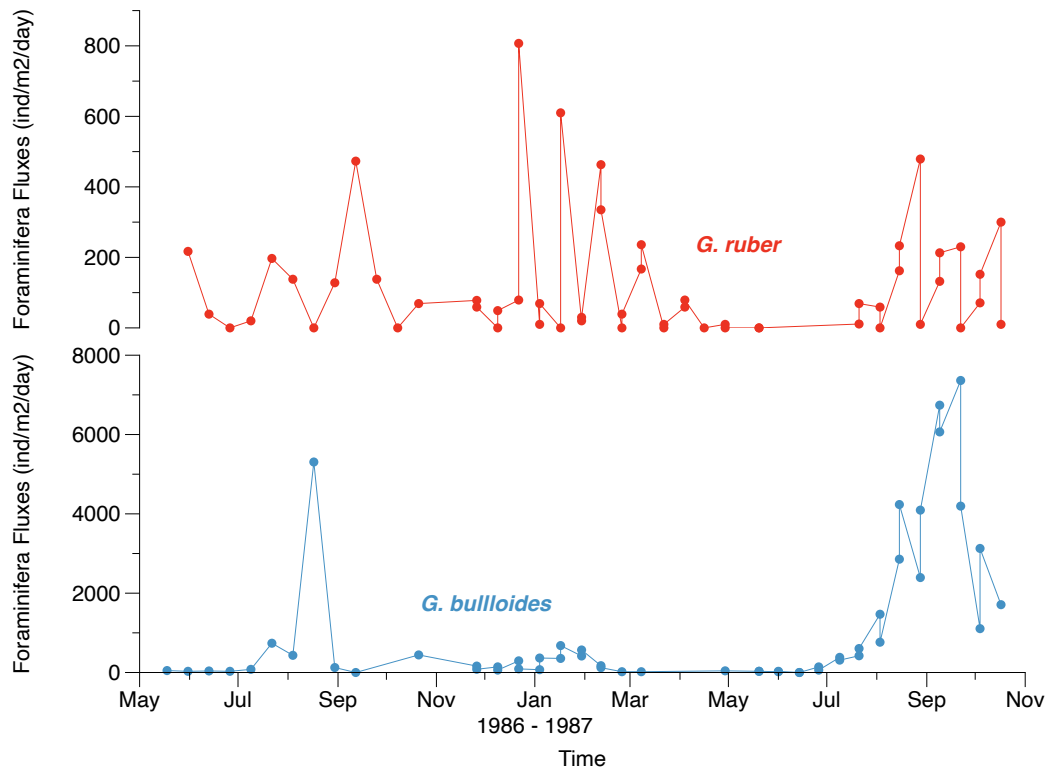

**Figure S6: Foraminifera flux from sediment trap over Arabian sea. Data are extracted from the Forcis database (Chaabane et al., 2023).** Both plots show the proportion of surface planktic foraminifera near site NIOP 905. Most *G. bulloides* flux are found during the summer monsoon (July-Setemper) and can be related to the upwelling intensity. *G. ruber* is found throughout the year.

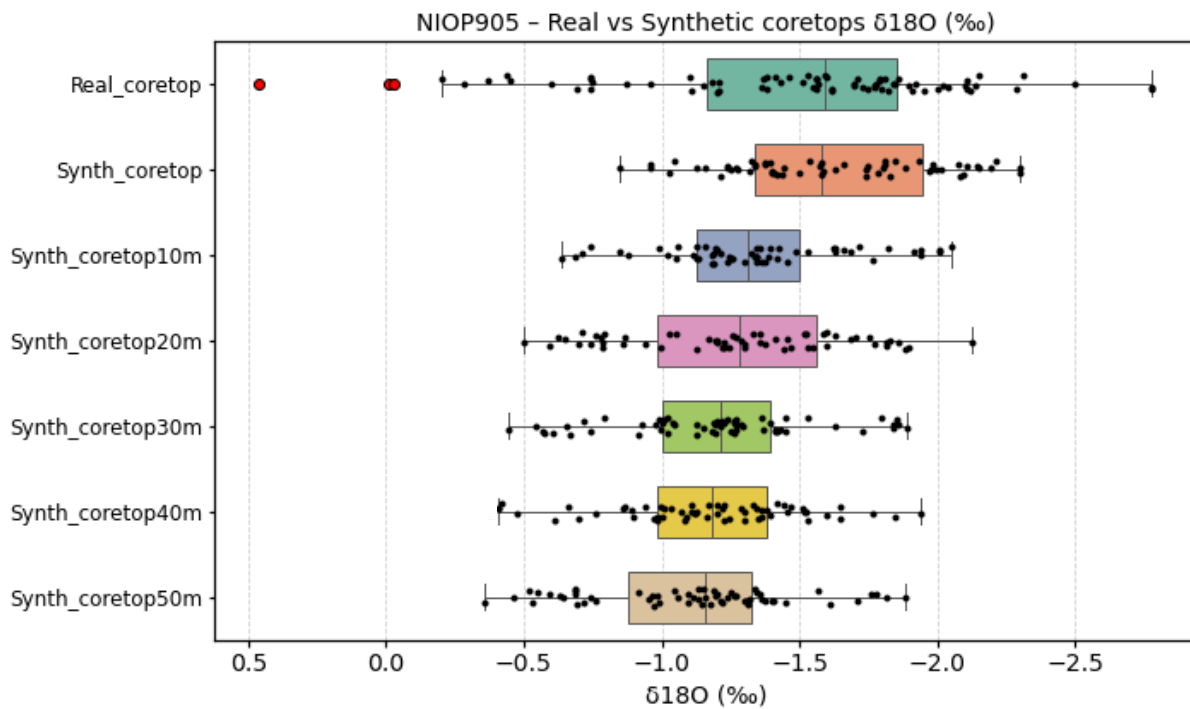

**Figure S7: Effect of calcification depth on modelled IFA- $\delta^{18}O$  distributions at site NIOP 905.**

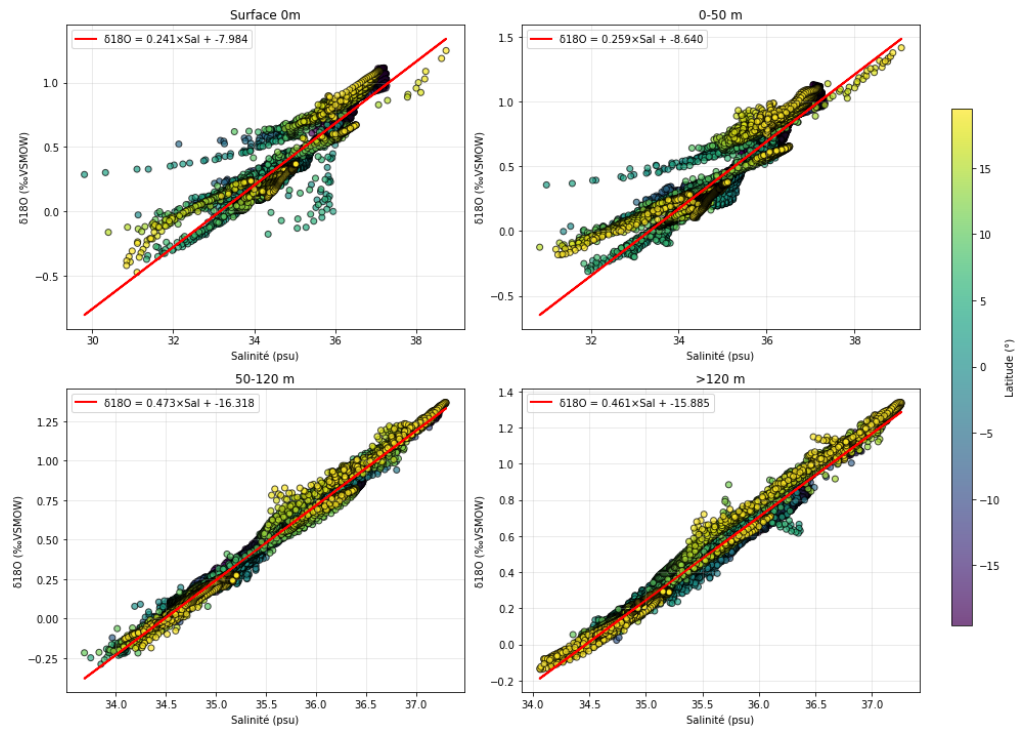

**Figure S8:** Relationship for  $\delta^{18}\text{O}_{\text{sw}}$  vs salinity for different depth from the surface to subsurface in the tropical Indian Ocean
